# Supplementary material for: TRMT10A regulates tRNA-ArgCCT m1G9 modification to generate tRNA-derived fragments influencing vasculogenic mimicry formation in glioblastoma
Source: Springer Nature journal article supplement (doi:10.1038/s41419-025-07548-6), 2025-03-26

**Supplementary Fig. 1 Original western blots of Figure 1E.**

**TRMT10A**

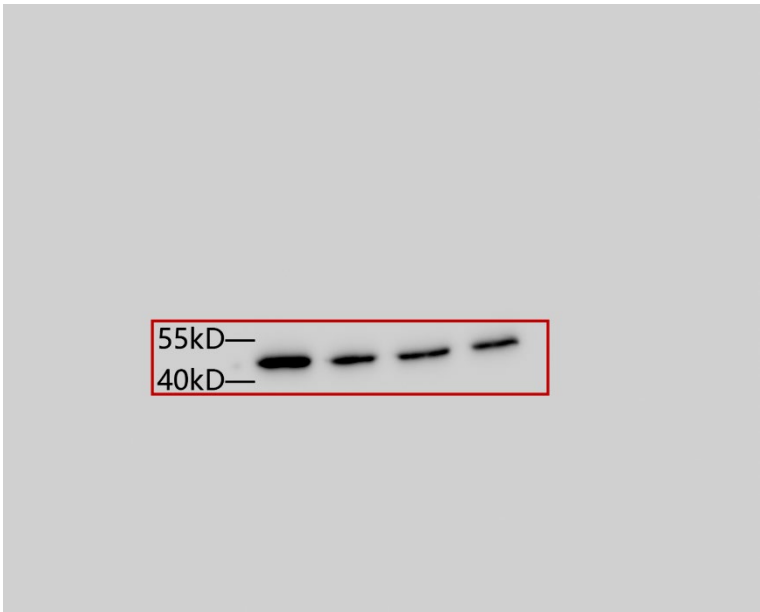

**GAPDH**

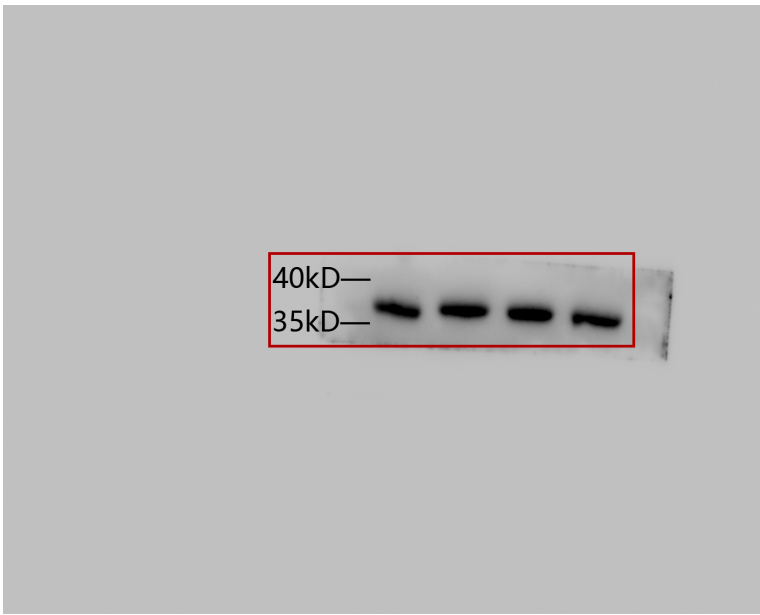

Supplementary Fig. 2 Original western blots of Figure 1G.

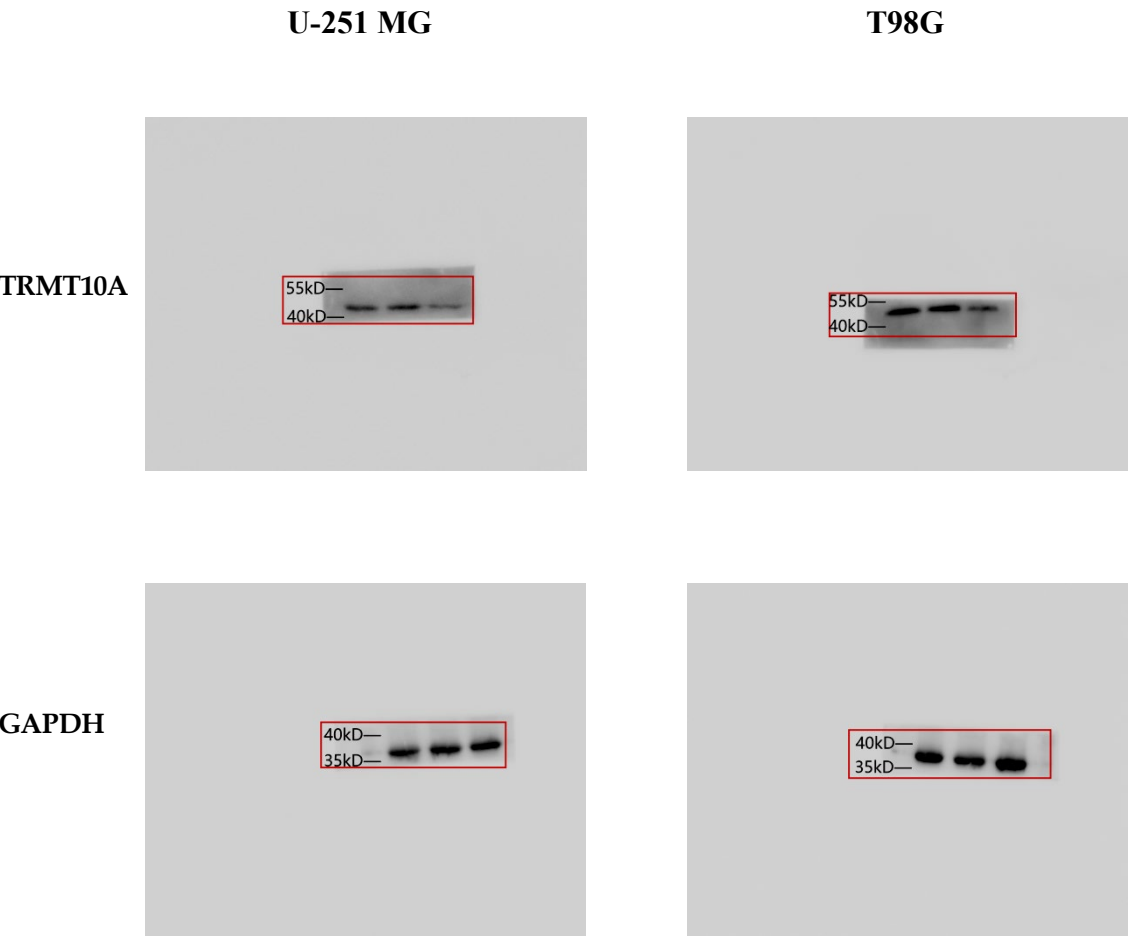

**Supplementary Fig. 3 Original western blots of Figure 1M.**

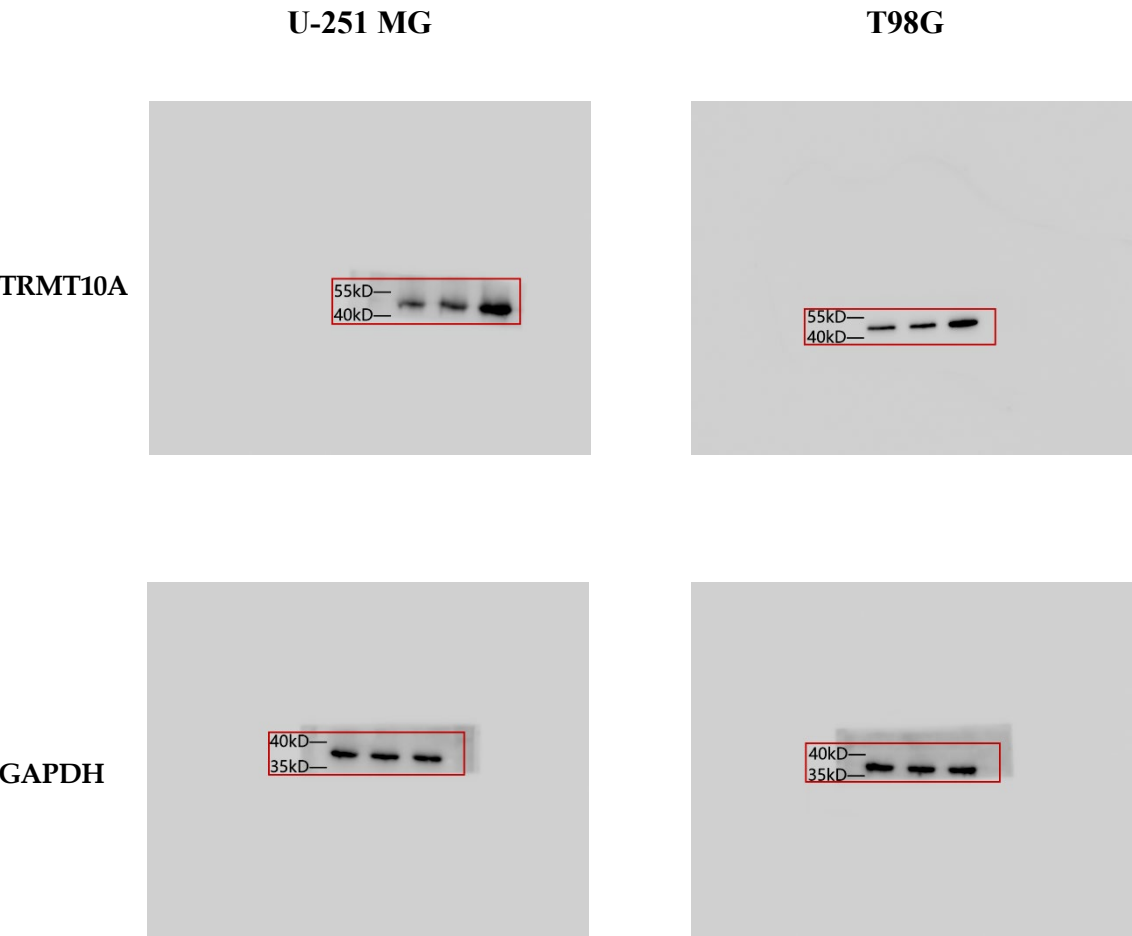

Supplementary Fig. 4 Original western blots of Figure 4G.

GAPDH

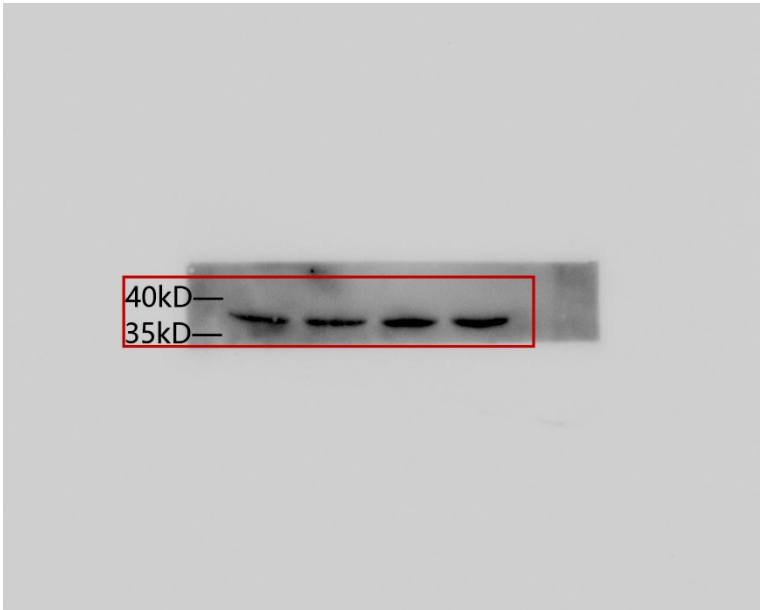

MXD1

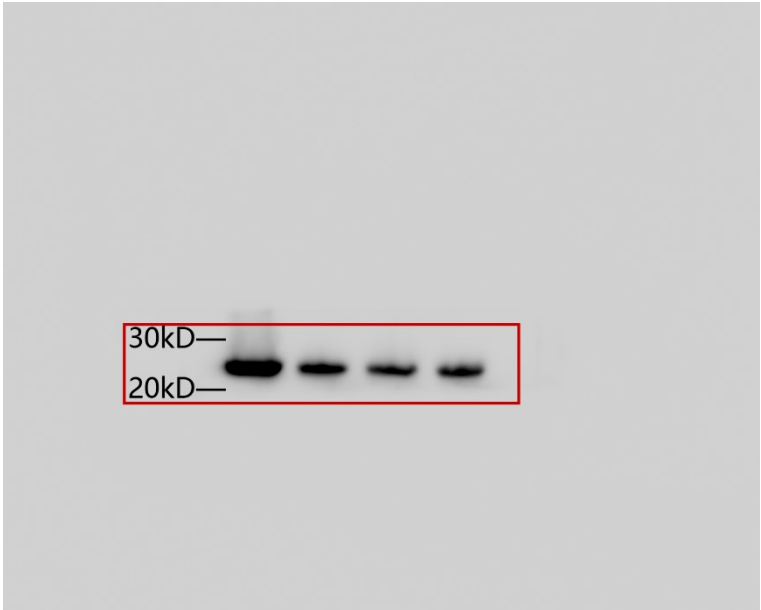

**Supplementary Fig. 5 Original western blots of Figure 4I (left panel).**

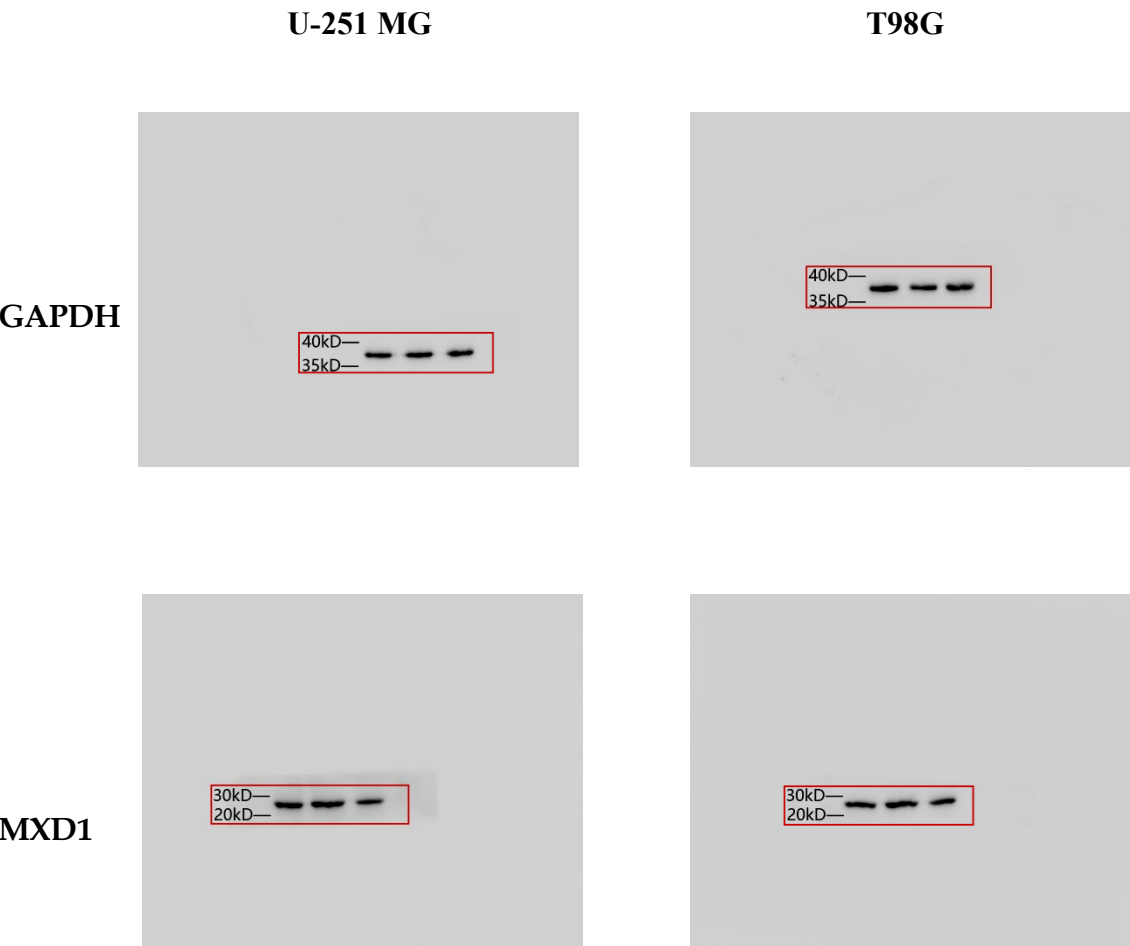

**Supplementary Fig. 6 Original western blots of Figure 4I (right panel).**

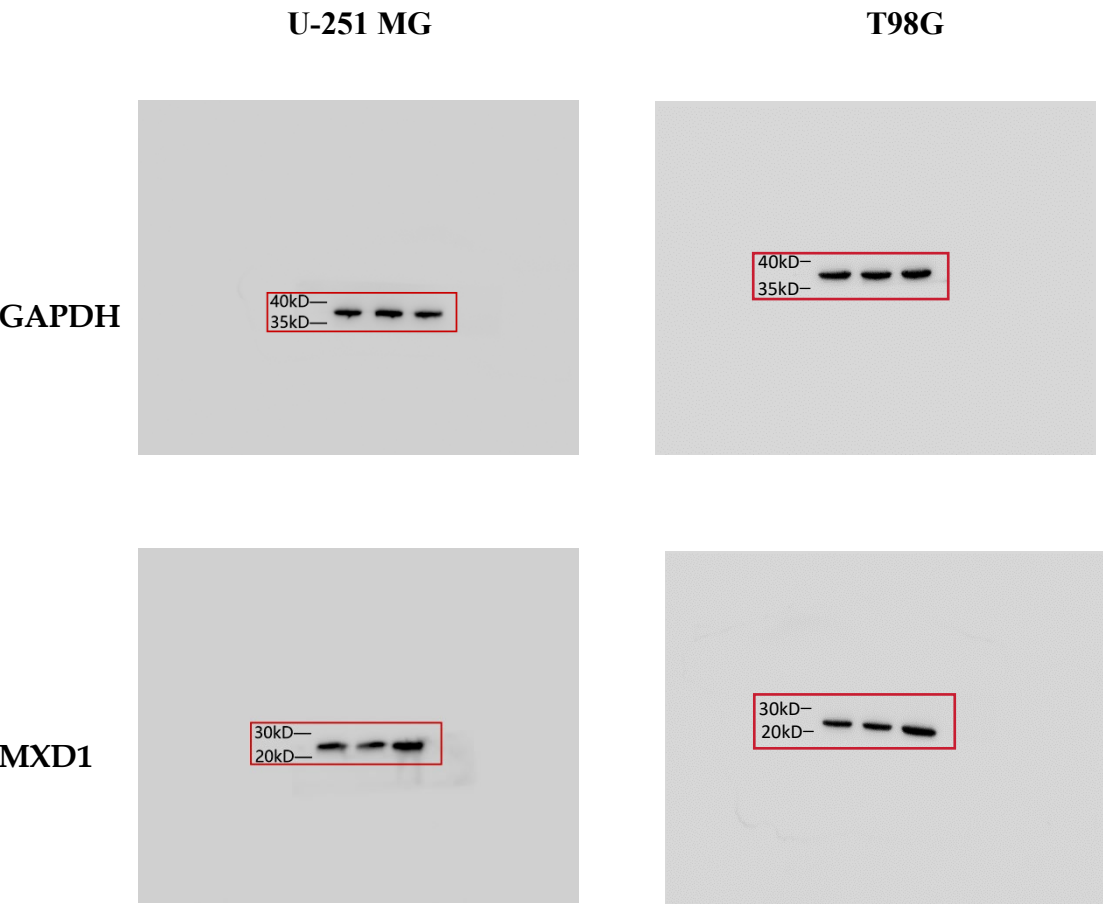

**Supplementary Fig. 7 Original western blots of Figure 5B (left panel).**

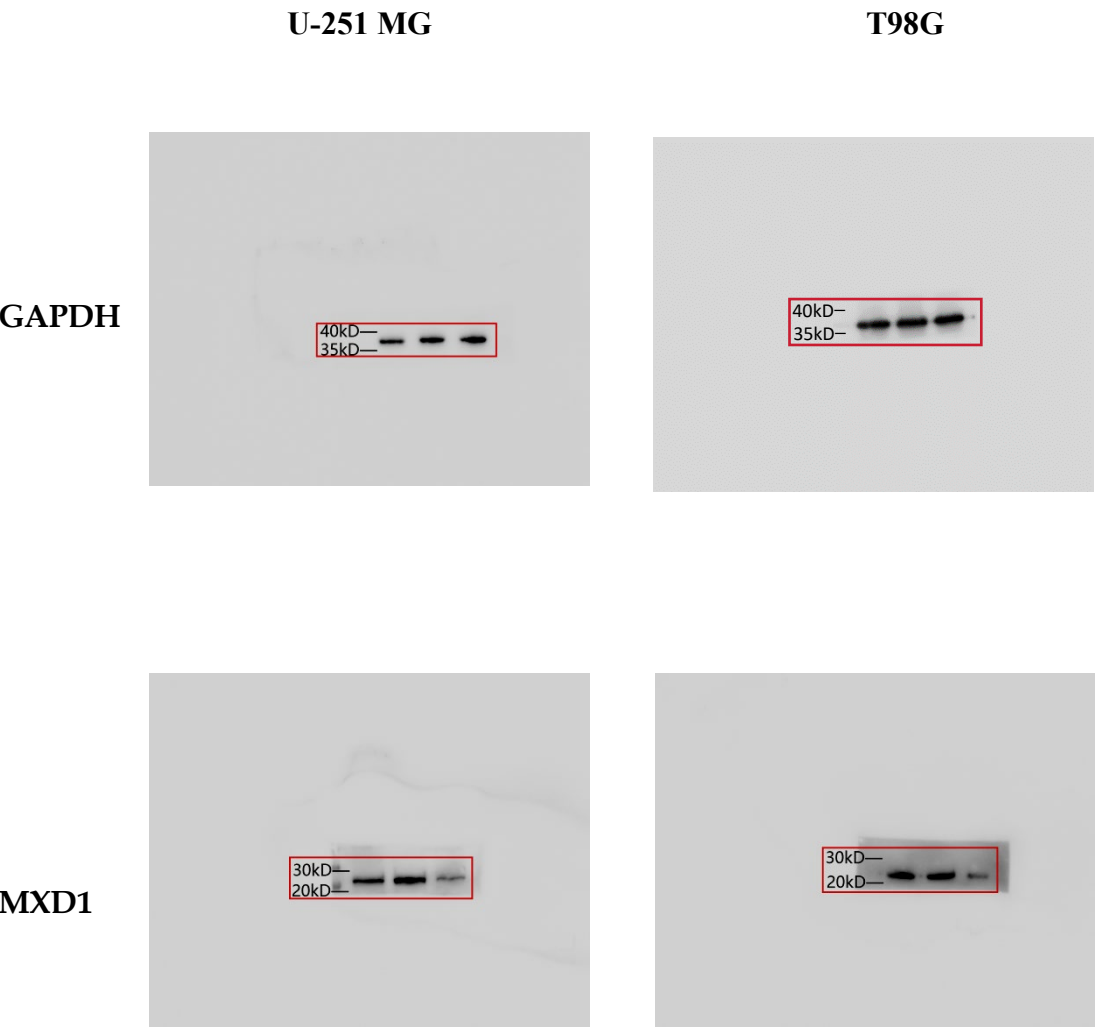

**Supplementary Fig. 8 Original western blots of Figure 5B (right panel).**

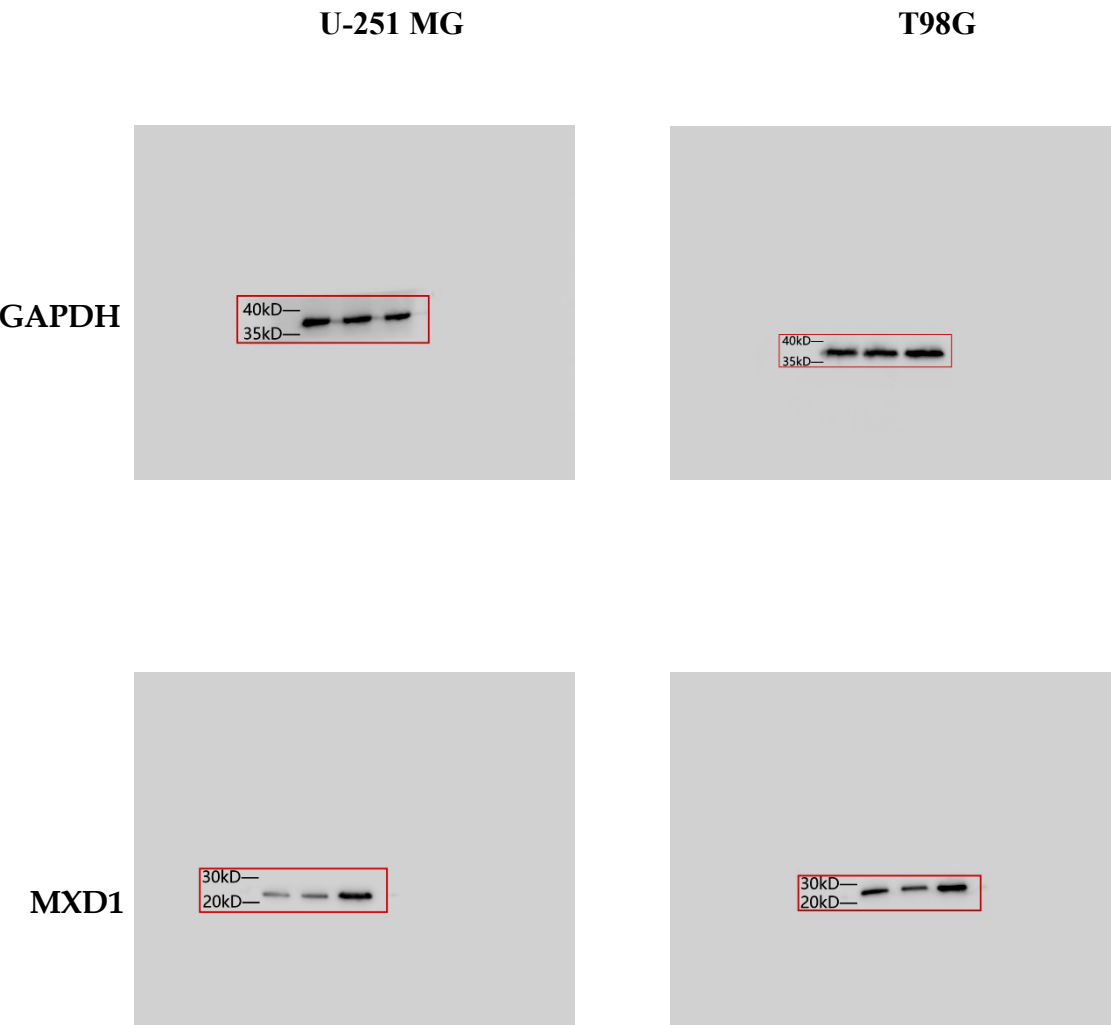



Supplementary Fig. 9 Original western blots of Figure 6B.

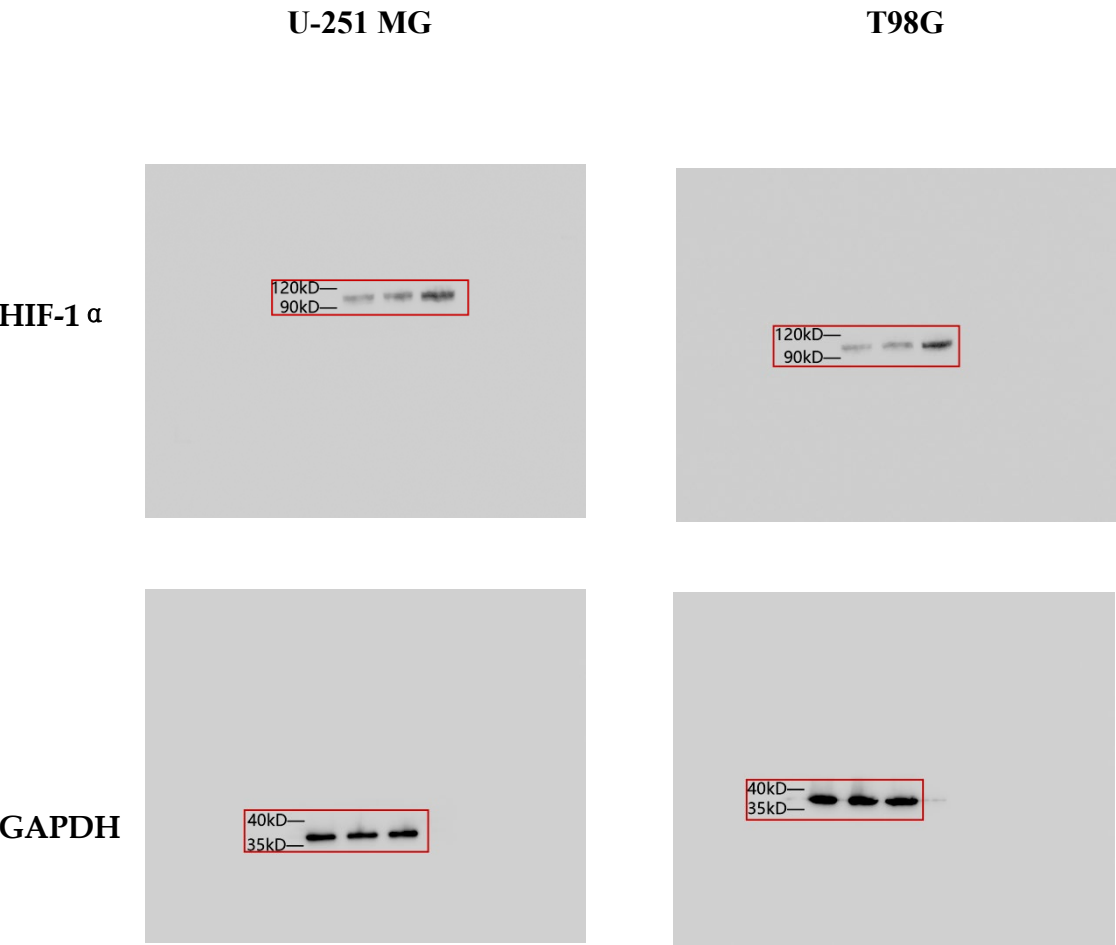

Supplement: MOESM3 [file 41419_2025_7548_MOESM3_ESM.pdf]
